# Supplementary material for: bsnsing: A Decision Tree Induction Method Based on Recursive Optimal Boolean Rule Composition
Source: Atypon-hosted journal article supplement (doi:10.1287/ijoc.2022.1225), 2022-07-27
Supplement: ijoc.2022.1225.sm1.zip [file Readme.pdf › JOC_supplement/Readme.pdf]

## Supplemental material for the manuscript entitled “bsnsing: A decision tree induction method based on recursive optimal Boolean rule composition”

The source code of the *bsnsing* library is hosted at <https://github.com/profyliu/bsnsing>

The benchmarking experiment program (R and Python code) and numerical results are available at [https://github.com/profyliu/bsnsing\\_test](https://github.com/profyliu/bsnsing_test)

All 75 data sets used in the manuscript’s Table 7 to Table 11 (except for the FICO’s *bank* data set, which must be obtained separately by the user from the FICO website, hence the total number of data sets is 74) are available here, in both the RData format and the CSV format.

To load all data sets into the R environment, run the R command:

```
load("all_data_but_bank.RData")
```

The csv folder contains the 74 data files in CSV format.

The data used for benchmarking with Gurobi, DL8.5, OSDT and GOSDT, i.e., Table 4 to Table 6 in the manuscript, are available in the folders *pydl8.5\_datasets* and *pydl8.5\_datasets\_split\_20*

For questions and further requests, please contact the author Yanchao Liu, [yanchaoliu@wayne.edu](mailto:yanchaoliu@wayne.edu)
